# Supplementary material for: Sesamol-based polybenzoxazines for ultra-low-k, high-k and hydrophobic coating applications
Source: Royal Society of Chemistry journal article supplement (doi:10.1039/d3nj00531c), 2023-01-01
Supplement: d3nj00531c1.pdf [file d3nj00531c1.pdf]

## Sesamol based polybenzoxazines for ultra-low k, high-k and hydrophobic coating applications

Mohamed Mydeen K, Hariharan Arumugam\*, Balaji Krishnasamy\*, Alagar Muthukaruppan\*

### Supporting Information

#### **S1 Preparation of functionalized bio-silica from bamboo grass**

Bamboo grass was washed with distilled water and dried for 3 h at 60°C. After being treated with concentrated HCl to remove any impurities, the dried bamboo grass was continuously rinsed with water until the pH becomes neutral. After that it was placed in a muffle furnace for 5 h at 600°C to obtain bio-silica (SiO<sub>2</sub>). Simultaneously, 4 ml of glycidylpropyltrimethoxysilane (GPTMS) in 95% absolute ethanol and 5% deionized water was added and sonicated for 20 minutes. Acetic acid was used to initially lower the pH of the above solution to 4.5, then continued sonication for an hour. Followed by 10 g of bio-silica obtained from bamboo grass was added, then the mixture was refluxed for 24 h at 80°C to obtain functionalized bio-silica. The product was centrifuged and washed with water followed by ethanol/hexane and then dried in a hot air oven at 80°C to remove the moisture (Scheme 5).

#### **S2 Synthesis of the graphitic carbon nitride (GCN)**

Synthesis of GCN was carried out by the direct heating of melamine in a muffle furnace. For this synthesis, 10 g of melamine was placed in an alumina crucible and heated up to 600°C for 4 h. After 4 h, the yellow GCN precipitate was formed, which was cooled to room temperature and subsequently collected for use in the next step.

#### **FTIR spectral analysis cardanol functionalized GCN**

According to the Fig.S1, the peak for pure graphitic carbon nitride (GCN) at 809 cm<sup>-1</sup> can be attributed to triazine units and the peaks at 1540 and 1635 cm<sup>-1</sup> can be related to C=N stretching. Also the peaks at 1234, 1317 and 1399 cm<sup>-1</sup> can be attributed to aromatic C-N stretching. The relatively broad peak in 3100-3260 cm<sup>-1</sup> can be related to terminal NH<sub>2</sub> or NH groups of the aromatic ring. The peak at 930 cm<sup>-1</sup> represents the formation of oxazine ring in the cardanol functionalized graphitic carbon nitride (GCN-c). Further the peaks in the region of 2952-2817 cm<sup>-1</sup> shows the presence of side chain aliphatic C-H stretching vibrations which supports the utilization of cardanol towards functionalization.

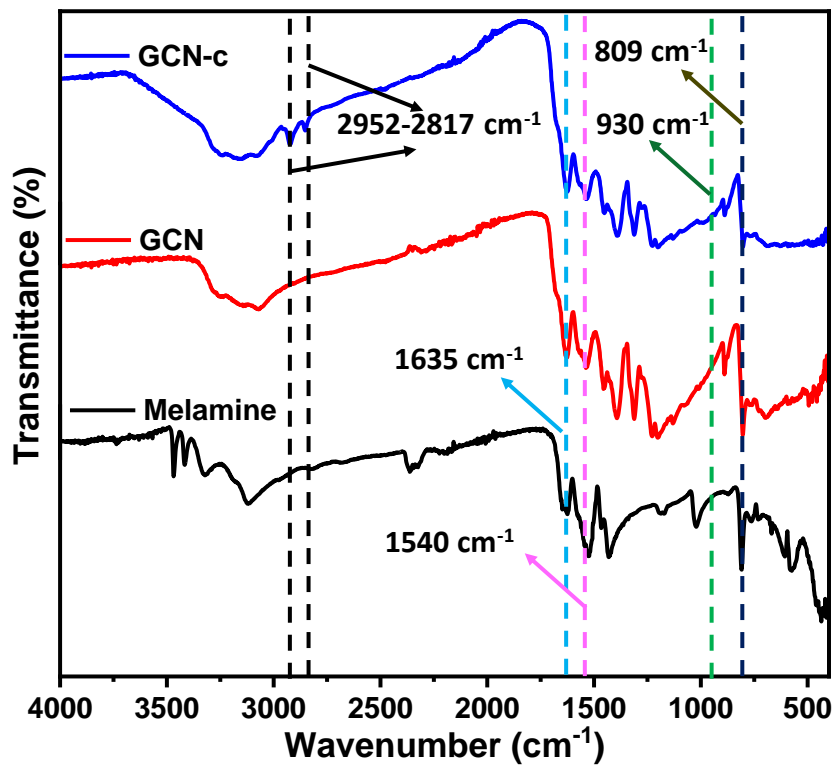

Fig. S1 FTIR spectra of (a) melamine (b) synthesized graphitic carbon nitride (c) GCN-c

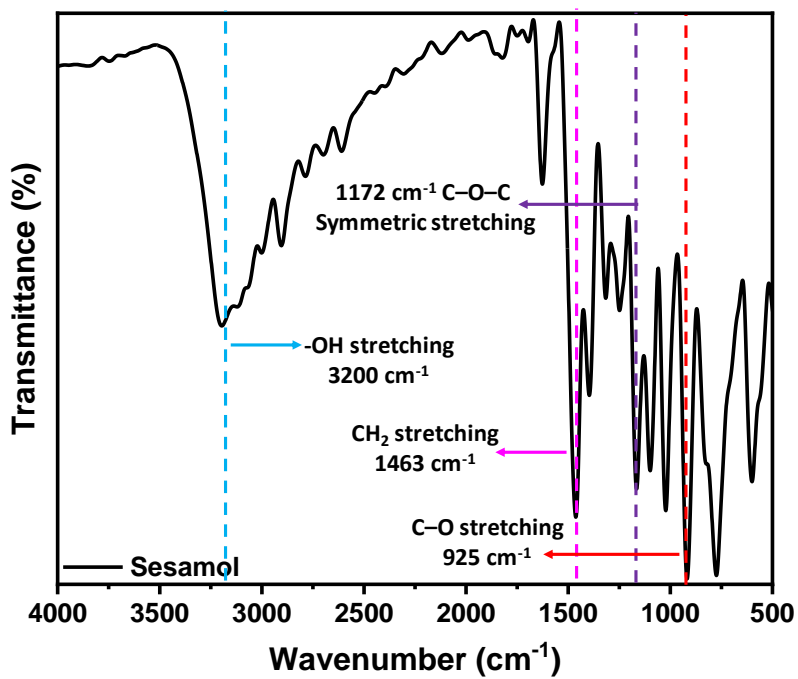

Fig. S2 FTIR spectrum of sesamol

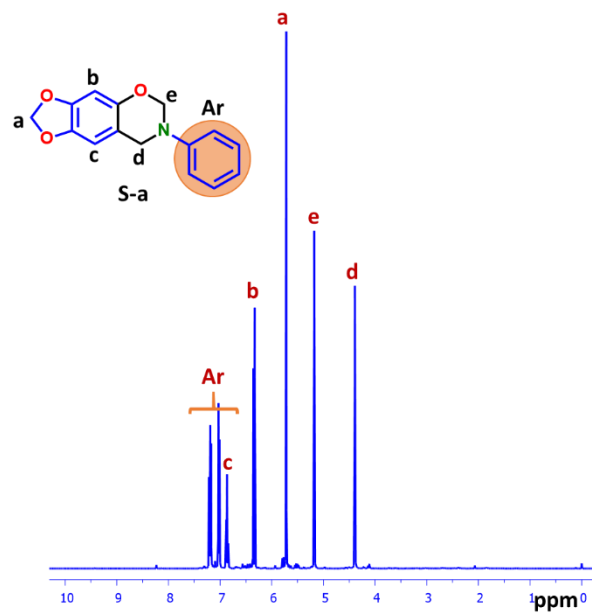

**Fig. S3** <sup>1</sup>H-NMR spectrum of S-a benzoxazine monomer

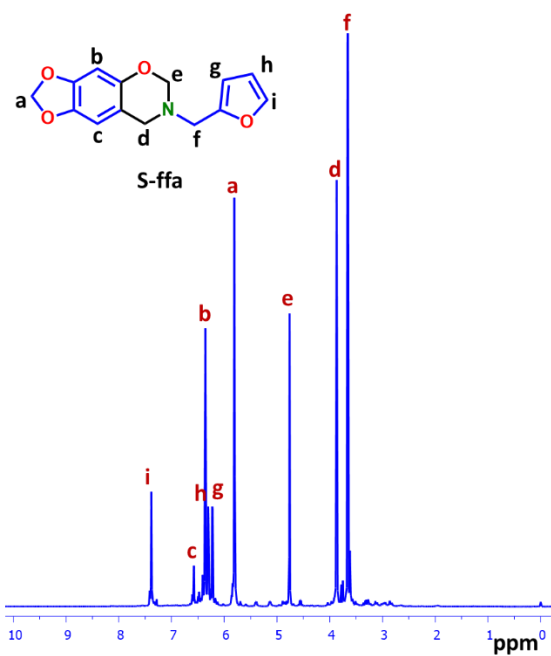

**Fig. S4** <sup>1</sup>H-NMR spectrum of S-ffa benzoxazine monomer

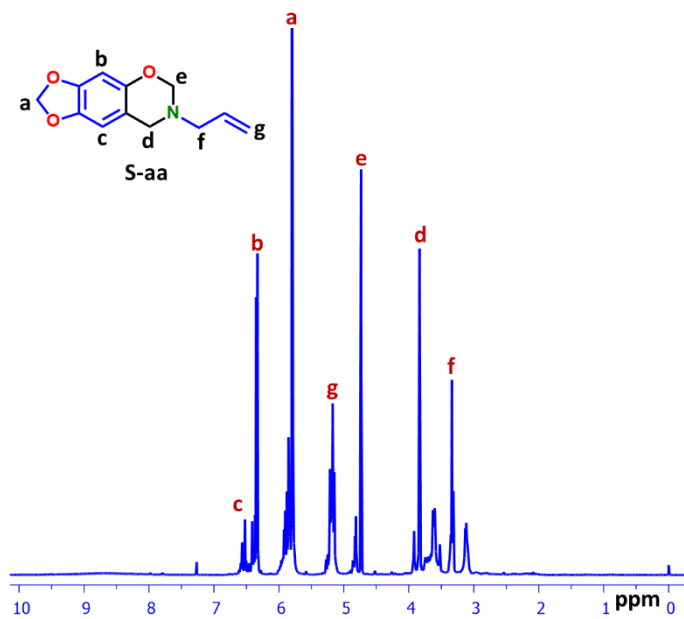

**Fig. S5**  $^1\text{H-NMR}$  spectrum of S-aa benzoxazine monomer

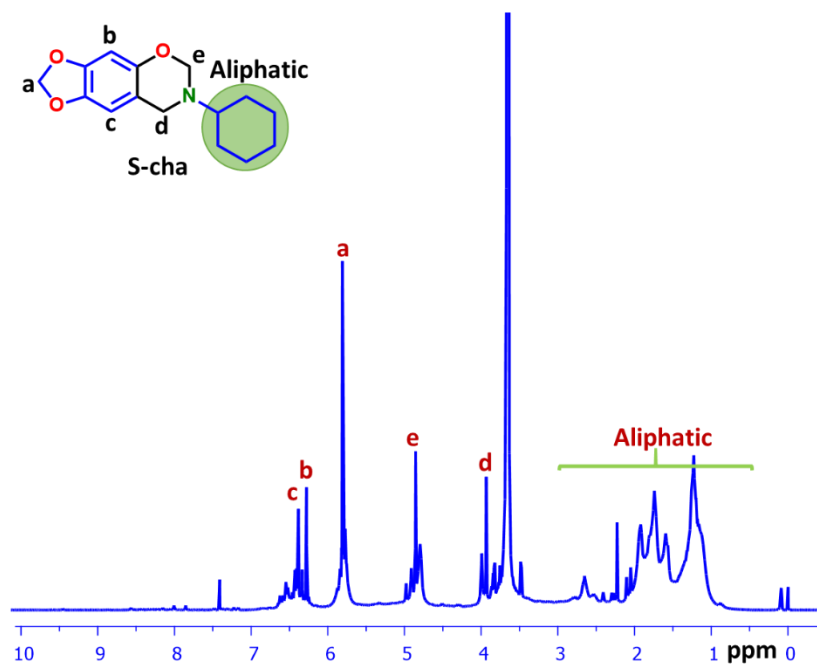

**Fig. S6**  $^1\text{H-NMR}$  spectrum of S-cha benzoxazine monomer

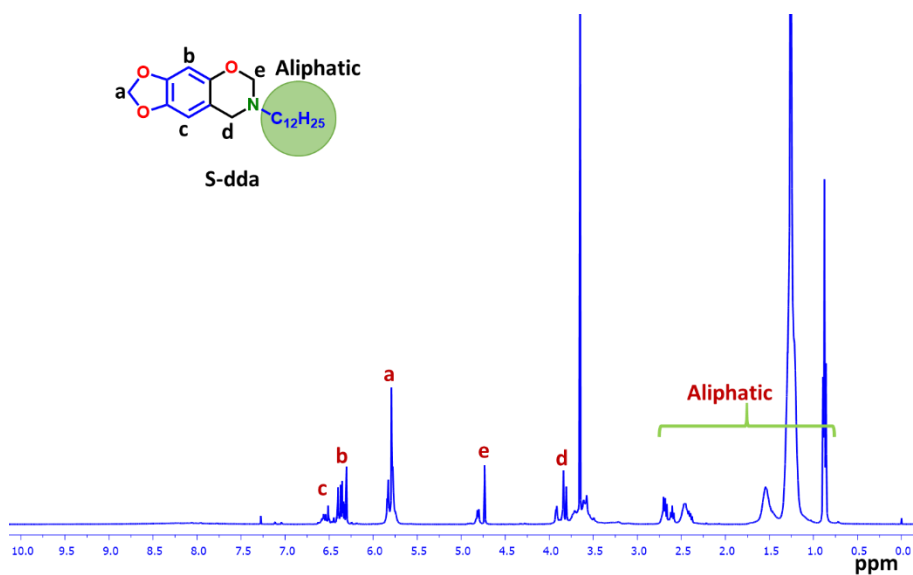

**Fig. S7** <sup>1</sup>H-NMR spectrum of S-dda benzoxazine monomer

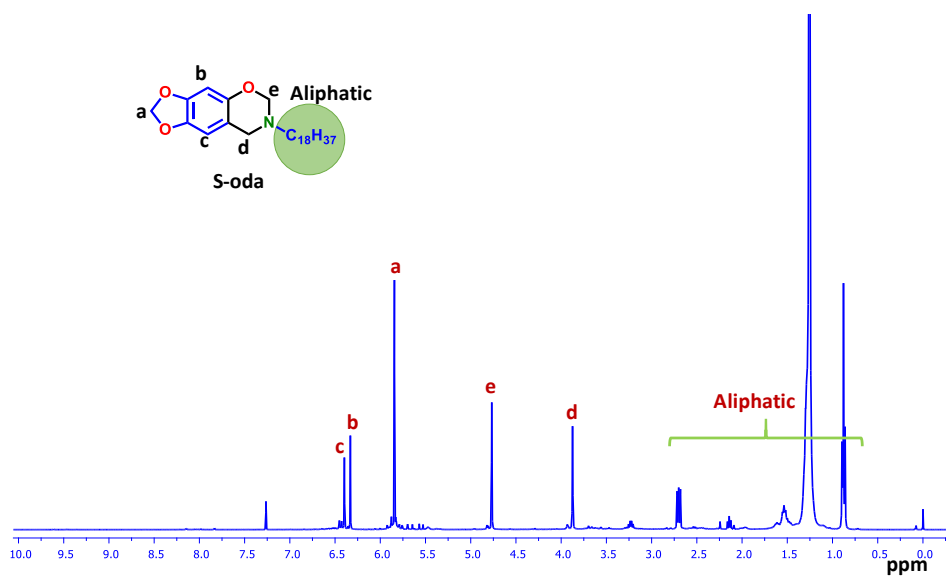

**Fig. S8** <sup>1</sup>H-NMR spectrum of S-oda benzoxazine monomer

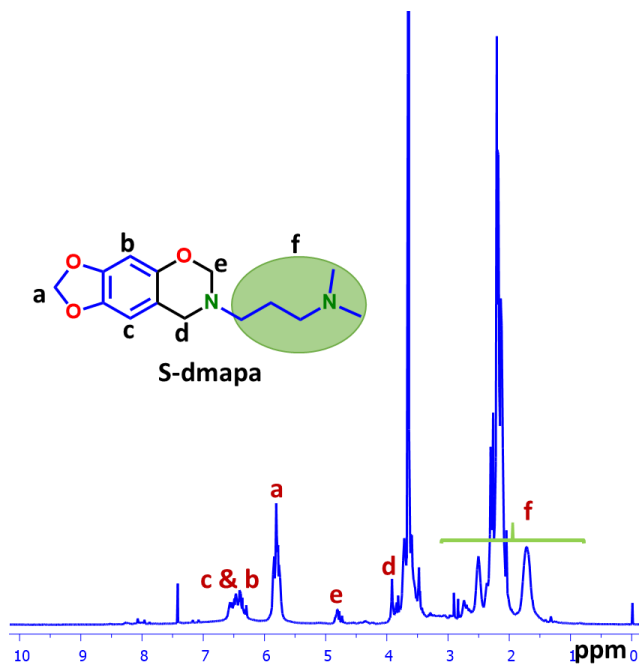

**Fig. S9** <sup>1</sup>H-NMR spectrum of S-dmapa benzoxazine monomer

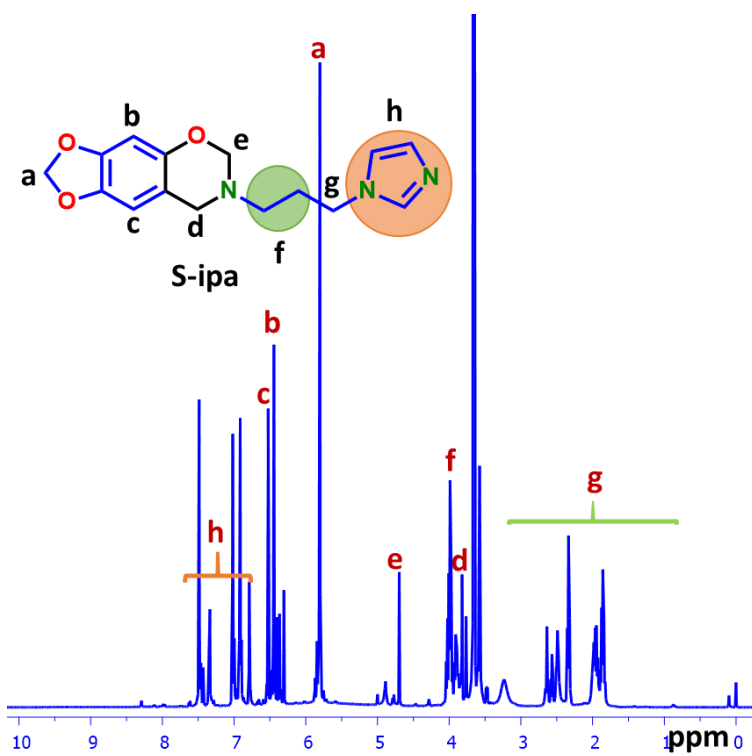

**Fig. S10** <sup>1</sup>H-NMR spectrum of S-ipa benzoxazine monomer

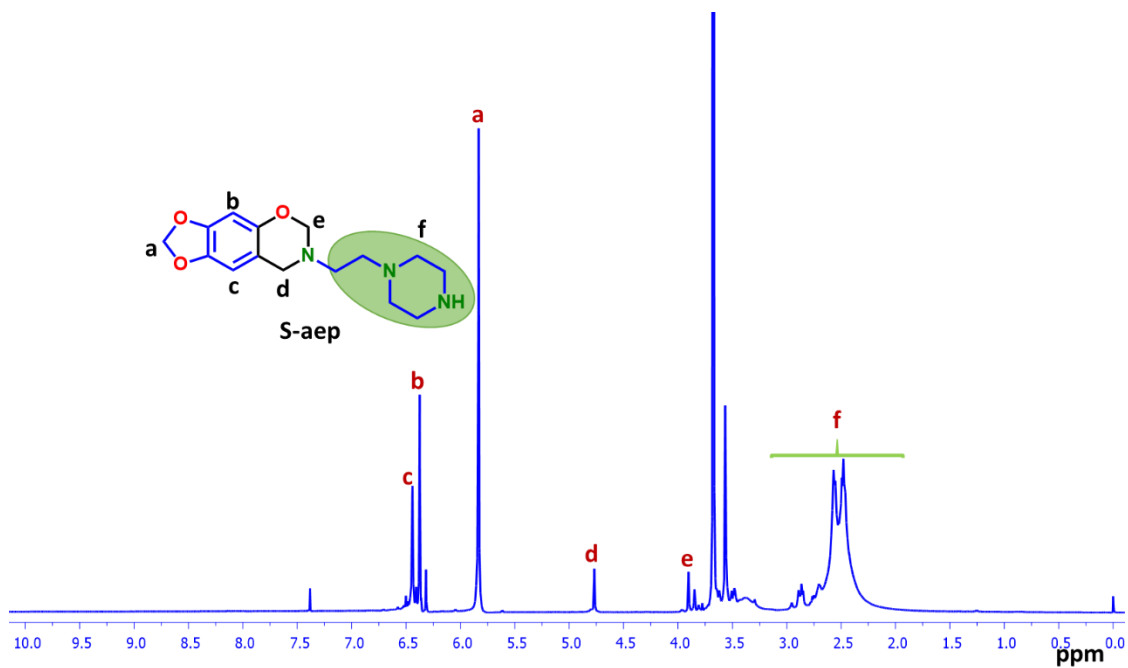

**Fig. S11** <sup>1</sup>H-NMR spectrum of S-aep benzoxazine monomer

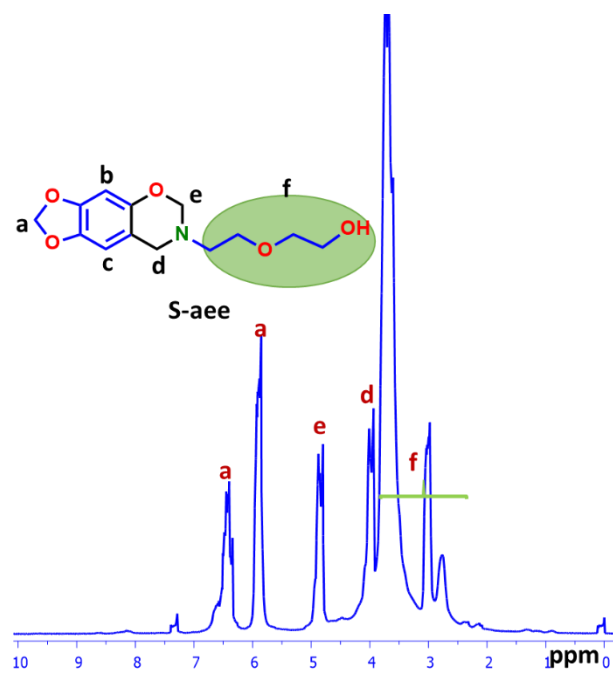

**Fig. S12** <sup>1</sup>H-NMR spectrum of S-aeo benzoxazine monomer

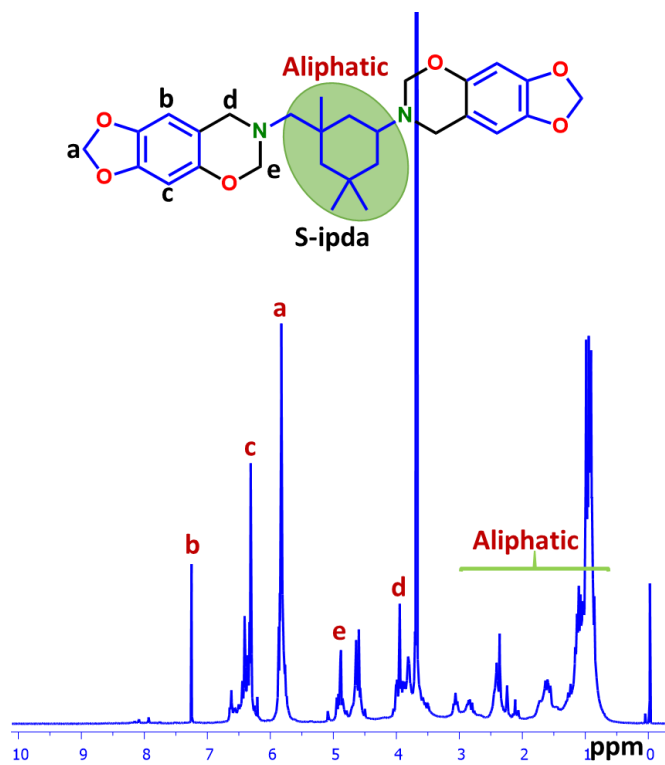

Fig. S13  $^1\text{H-NMR}$  spectrum of S-ipda benzoxazine monomer

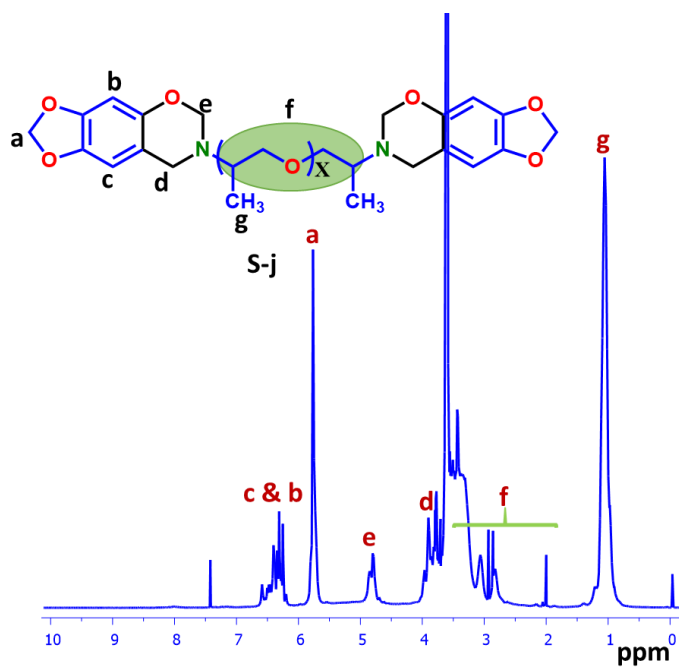

Fig. S14  $^1\text{H-NMR}$  spectrum of S-j benzoxazine monomer



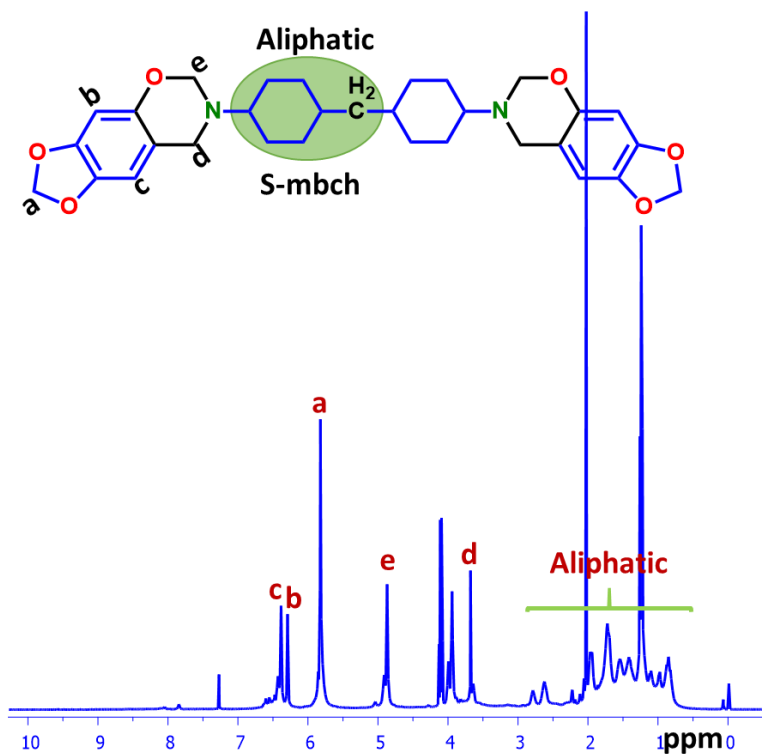

Fig. S15 <sup>1</sup>H-NMR spectrum of S-mbch benzoxazine monomer

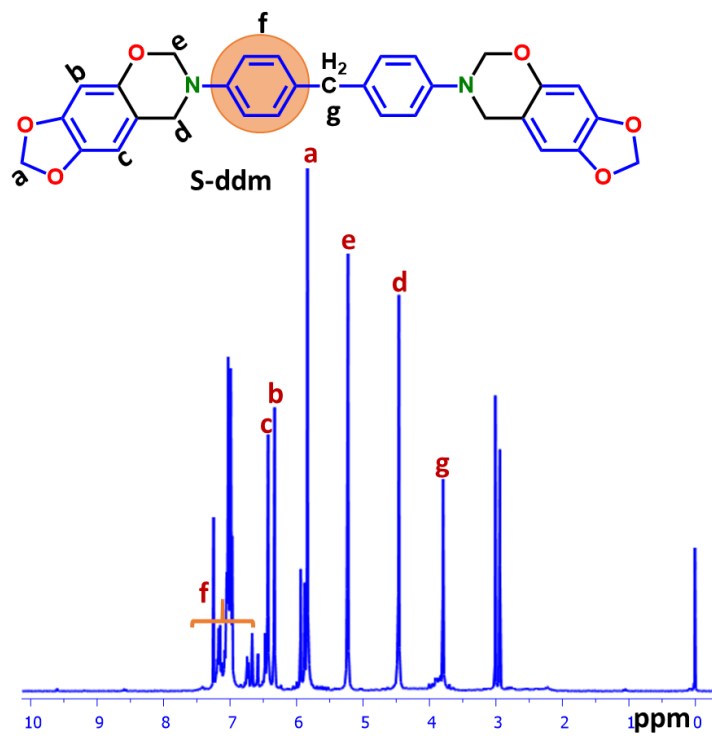

Fig. S16 <sup>1</sup>H-NMR spectrum of S-ddm benzoxazine monomer

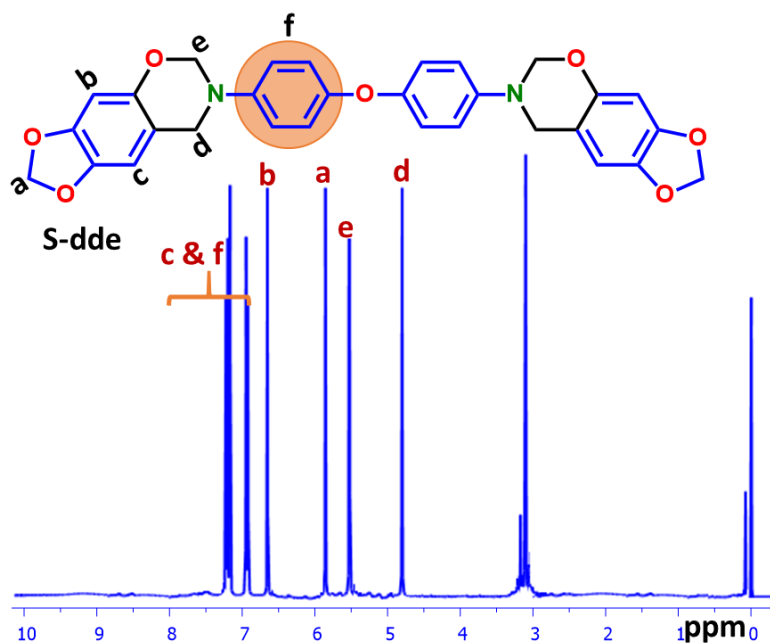

**Fig. S17** <sup>1</sup>H-NMR spectrum of S-dde benzoxazine monomer

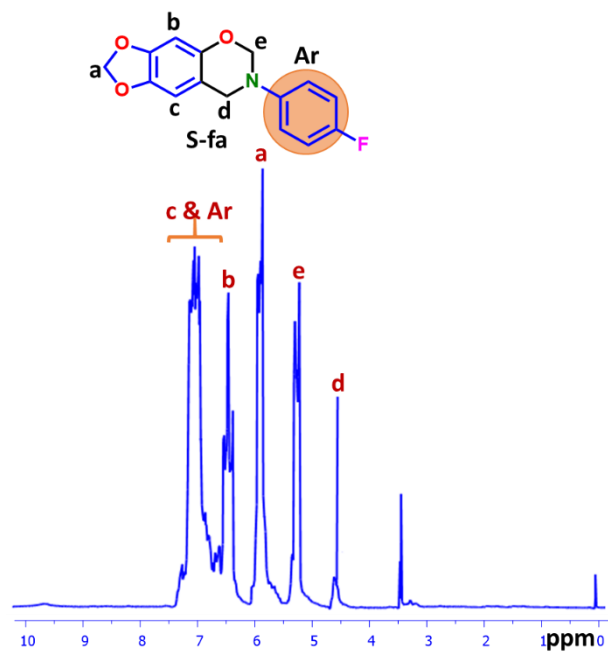

**Fig. S18** <sup>1</sup>H-NMR spectrum of S-fa benzoxazine monomer

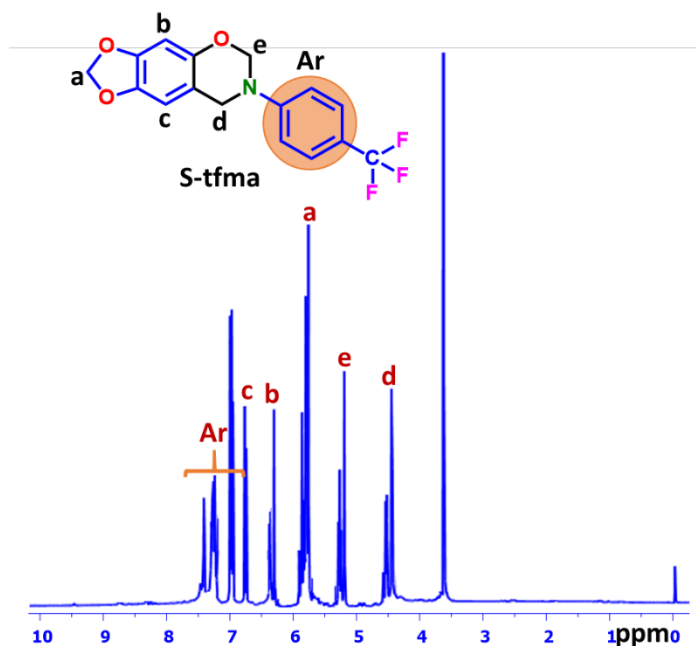

Fig. S19  $^1\text{H-NMR}$  spectrum of S-tfma benzoxazine monomer

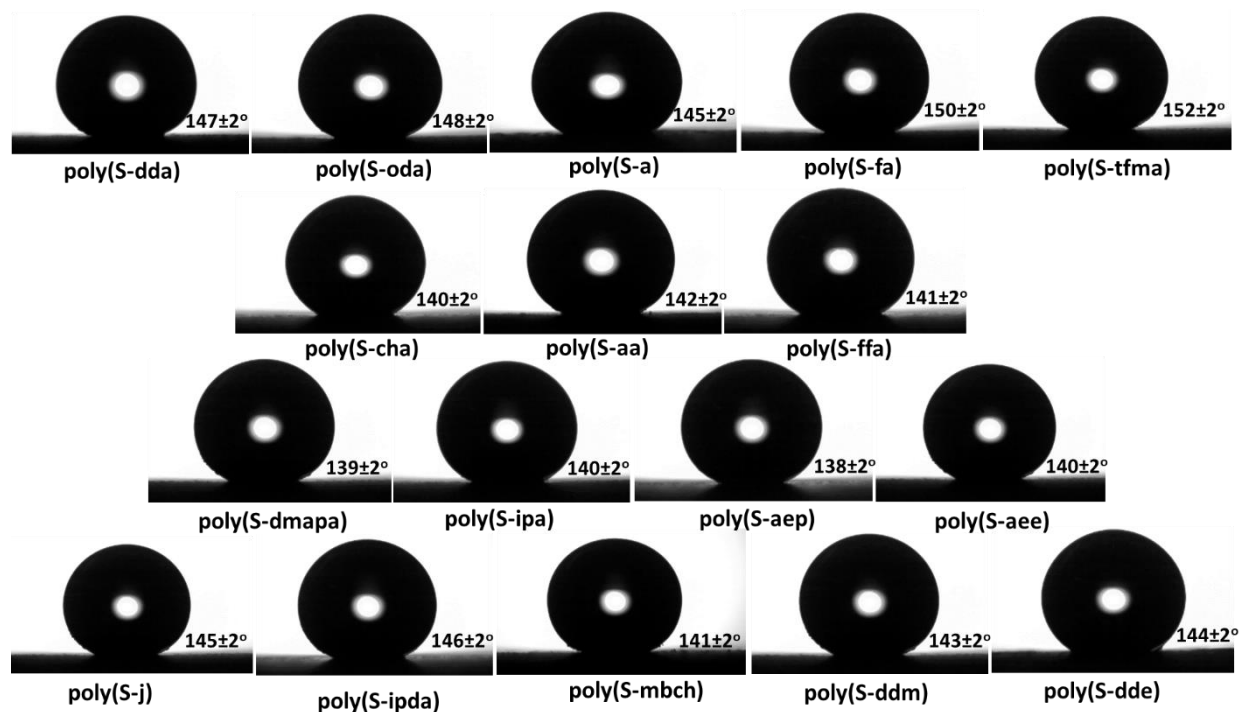

Fig. S20 Water contact angle images of sesamol based polybenzoxazines.

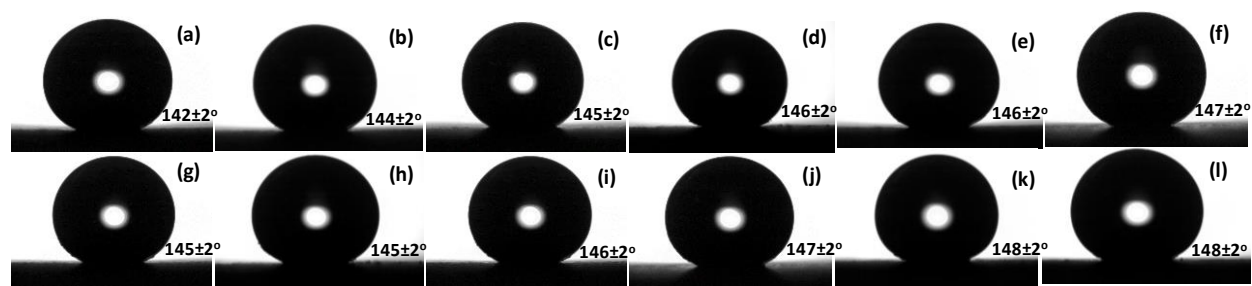

**Fig. S21** Water contact angle images of sesamol based (a-f) bio-silica reinforced poly(S-ffa) and (g-l) GCN-c reinforced poly(S-dde) composites.

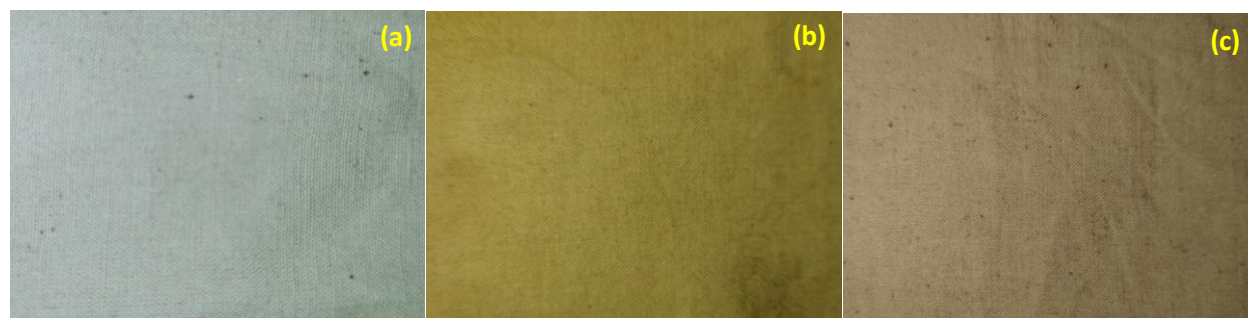

**Fig. S22** Photographs of (a) neat cotton fabric, (b) benzoxazine coated cotton fabric and (c) cured cotton fabric
